# Supplementary material
Source: publisher figshare collection journal article supplement (https://tandf.figshare.com/ndownloader/files/16378316)
Supplement: Supplementary file 1 [file 16378316]

## A survey of opinions towards dog and cat management policy issues in New Zealand

MC Gates<sup>\*§</sup>, J Walker<sup>†</sup>, S Zito<sup>‡</sup> and A Dale<sup>‡</sup>

\* School of Veterinary Science, Massey University, Private Bag 11-222, Palmerston North, 4442, New Zealand

†New Zealand Companion Animal Council, PO Box 4, Waiuku, Auckland, 2341, New Zealand

‡RNZSPCA, PO Box 15-309, New Lynn, Auckland, 0640, New Zealand

§Corresponding author. E-mail: c.gates@massey.ac.nz

**Supplementary Table 1. Importance of different pet management practices to 443 dog owners, 696 cat owners, and 559 respondents with no pets.**

| Variable                         | Respondent Type | Level of importance (n, (%)) |                    |                |            |
|----------------------------------|-----------------|------------------------------|--------------------|----------------|------------|
|                                  |                 | Not important                | Somewhat important | Very important | Don't know |
| Desexing                         | Dog Owners      | 24 (5.4%)                    | 113 (25.5%)        | 288 (65.0%)    | 18 (4.1%)  |
|                                  | Cat Owners      | 12 (1.7%)                    | 116 (16.7%)        | 554 (79.5%)    | 14 (2.0%)  |
|                                  | Own No Pets     | 24 (4.3%)                    | 128 (22.9%)        | 359 (64.2%)    | 48 (8.9%)  |
| Preventing predation             | Dog Owners      | 13 (2.9%)                    | 108 (24.4%)        | 264 (59.6%)    | 58 (13.1%) |
|                                  | Cat Owners      | 27 (3.9%)                    | 233 (33.4%)        | 339 (48.7%)    | 97 (13.9%) |
|                                  | Own No Pets     | 5 (0.9%)                     | 113 (20.2%)        | 369 (66.0%)    | 72 (12.9%) |
| Exercise                         | Dog Owners      | 2 (0.5%)                     | 44 (9.9%)          | 388 (87.6%)    | 9 (2.0%)   |
|                                  | Cat Owners      | 21 (3.0%)                    | 106 (15.2%)        | 550 (79.0%)    | 19 (2.7%)  |
|                                  | Own No Pets     | 4 (0.7%)                     | 40 (7.2%)          | 504 (90.2%)    | 11 (2.0%)  |
| Microchipping                    | Dog Owners      | 44 (9.9%)                    | 166 (37.5%)        | 214 (48.3%)    | 19 (4.3%)  |
|                                  | Cat Owners      | 151 (21.7%)                  | 276 (39.7%)        | 221 (31.8%)    | 48 (6.9%)  |
|                                  | Own No Pets     | 35 (6.3%)                    | 217 (38.8%)        | 265 (47.4%)    | 42 (7.5%)  |
| Registration                     | Dog Owners      | 28 (6.3%)                    | 102 (23.0%)        | 303 (68.4%)    | 10 (2.3%)  |
|                                  | Cat Owners      | 129 (18.5%)                  | 186 (26.7%)        | 336 (48.3%)    | 45 (6.5%)  |
|                                  | Own No Pets     | 10 (1.8%)                    | 102 (18.2%)        | 426 (76.2%)    | 21 (3.8%)  |
| Annual vet checks                | Dog Owners      | 17 (3.8%)                    | 109 (24.6%)        | 309 (69.8%)    | 8 (1.8%)   |
|                                  | Cat Owners      | 41 (5.9%)                    | 227 (32.6%)        | 411 (59.1%)    | 17 (2.4%)  |
|                                  | Own No Pets     | 10 (1.8%)                    | 124 (22.2%)        | 411 (73.5%)    | 14 (2.5%)  |
| Vet visit if animal injured/sick | Dog Owners      | 1 (0.2%)                     | 26 (24.6%)         | 406 (91.6%)    | 10 (2.3%)  |
|                                  | Cat Owners      | 4 (0.6%)                     | 49 (7.0%)          | 632 (90.8%)    | 11 (1.6%)  |
|                                  | Own No Pets     | 0 (0.0%)                     | 31 (5.5%)          | 516 (92.3%)    | 12 (2.2%)  |

The content of this supplementary information has not been edited. All risk and liability rest with the authors.

## Supplementary Information

*Gates et al.*

*New Zealand Veterinary Journal*

S2

---

|                            |             |          |           |             |           |
|----------------------------|-------------|----------|-----------|-------------|-----------|
| Providing adequate shelter | Dog Owners  | 2 (0.5%) | 14 (3.2%) | 416 (93.9%) | 11 (2.5%) |
|                            | Cat Owners  | 8 (1.1%) | 30 (4.3%) | 648 (93.1%) | 10 (1.4%) |
|                            | Own No Pets | 1 (0.2%) | 27 (4.8%) | 522 (93.4%) | 9 (1.6%)  |
| Providing nutritious diet  | Dog Owners  | 5 (1.1%) | 21 (4.7%) | 408 (92.1%) | 9 (2.0%)  |
|                            | Cat Owners  | 6 (0.9%) | 34 (4.9%) | 644 (92.5%) | 12 (1.7%) |
|                            | Own No Pets | 1 (0.2%) | 15 (2.7%) | 533 (95.3%) | 10 (1.8%) |

---

**Supplementary Table 2. Univariable analysis of predictors for 613 dogs and 1,045 cats in New Zealand being desexed**

| Variable                | Desexed |       | Intact |       | Univariable analysis |             |         |
|-------------------------|---------|-------|--------|-------|----------------------|-------------|---------|
|                         | N       | %     | N      | %     | OR                   | 95% CI      | p-value |
| Species                 |         |       |        |       |                      |             |         |
| Cat                     | 974     | 68.0% | 71     | 31.6% | 1.00                 | -           | -       |
| Dog                     | 459     | 32.0% | 154    | 68.4% | 0.21                 | 0.16 – 0.29 | <0.001  |
| Breed Type              |         |       |        |       |                      |             |         |
| Mixed Breed             | 1054    | 73.6% | 103    | 45.8% | 1.00                 | -           | -       |
| Registered Pedigree     | 108     | 7.5%  | 46     | 20.4% | 0.23                 | 0.15 – 0.34 | < 0.001 |
| Pure Breed              | 230     | 16.1% | 71     | 31.6% | 0.32                 | 0.23 – 0.44 | < 0.001 |
| Designer Breed          | 41      | 2.9%  | 5      | 2.2%  | 0.80                 | 0.34 – 2.35 | 0.648   |
| Source of Pet           |         |       |        |       |                      |             |         |
| Pet Store               | 129     | 9.0%  | 21     | 9.3%  | 1.00                 | -           | -       |
| Breeder / Hobbyist      | 297     | 20.7% | 77     | 34.2% | 0.63                 | 0.36 – 1.04 | 0.082   |
| Animal Shelter          | 290     | 20.2% | 14     | 6.2%  | 3.37                 | 1.67 – 6.98 | < 0.001 |
| Acquaintance            | 425     | 29.7% | 53     | 23.6% | 1.31                 | 0.75 – 2.21 | 0.336   |
| Stray                   | 133     | 9.3%  | 21     | 9.3%  | 1.03                 | 0.54 – 1.98 | 0.927   |
| Veterinarian            | 29      | 2.0%  | 4      | 1.8%  | 1.18                 | 0.41 – 4.27 | 0.776   |
| Other                   | 130     | 9.1%  | 35     | 15.6% | 0.60                 | 0.33 – 1.08 | 0.097   |
| Housing                 |         |       |        |       |                      |             |         |
| Indoor Only             | 175     | 12.2% | 29     | 12.9% | 1.00                 | -           | -       |
| Outdoor Only            | 83      | 5.8%  | 56     | 24.9% | 0.25                 | 0.14 – 0.41 | < 0.001 |
| Both Indoor and Outdoor | 1175    | 82.0% | 140    | 62.2% | 1.39                 | 0.89 – 2.11 | 0.133   |
| Microchipped            |         |       |        |       |                      |             |         |
| No                      | 754     | 52.6% | 144    | 50.7% | 1.00                 | -           | -       |
| Yes                     | 679     | 47.3% | 81     | 49.3% | 1.60                 | 1.20 – 2.15 | 0.002   |
| Region                  |         |       |        |       |                      |             |         |
| Auckland                | 429     | 29.9% | 79     | 35.1% | 1.00                 | -           | -       |
| Wellington              | 139     | 9.7%  | 14     | 6.2%  | 1.83                 | 1.04 – 3.46 | 0.049   |
| Other North Island      | 506     | 35.3% | 74     | 32.9% | 1.26                 | 0.89 – 1.77 | 0.187   |
| Christchurch            | 187     | 13.0% | 26     | 11.6% | 1.32                 | 0.83 – 2.16 | 0.247   |
| Other South Island      | 172     | 12.0% | 32     | 14.2% | 0.99                 | 0.64 – 1.56 | 0.964   |
| Location Type           |         |       |        |       |                      |             |         |
| Urban                   | 508     | 35.5% | 92     | 40.9% | 1.00                 | -           | -       |
| Suburban                | 561     | 39.1% | 47     | 20.9% | 2.16                 | 1.50 – 3.16 | < 0.001 |
| Regional Centre         | 102     | 7.1%  | 14     | 6.2%  | 1.32                 | 0.74 – 2.50 | 0.366   |

# Supplementary Information

Gates et al.

New Zealand Veterinary Journal

S4

|                                |      |       |     |       |      |             |         |
|--------------------------------|------|-------|-----|-------|------|-------------|---------|
| Rural                          | 262  | 18.3% | 72  | 32.0% | 0.66 | 0.46 – 0.93 | 0.017   |
| Age                            |      |       |     |       |      |             |         |
| 18-24                          | 186  | 13.0% | 50  | 22.2% | 1.00 | -           | -       |
| 25-29                          | 103  | 7.2%  | 29  | 12.9% | 0.95 | 0.57 – 1.61 | 0.861   |
| 30-34                          | 125  | 8.7%  | 22  | 9.8%  | 1.53 | 0.89 – 2.69 | 0.131   |
| 35-39                          | 140  | 9.8%  | 26  | 11.6% | 1.45 | 0.87 – 2.46 | 0.165   |
| 40-44                          | 126  | 8.8%  | 11  | 4.9%  | 3.08 | 1.60 – 6.44 | 0.001   |
| 45-49                          | 159  | 11.1% | 12  | 5.3%  | 3.56 | 1.89 – 7.22 | < 0.001 |
| 50-54                          | 129  | 9.0%  | 18  | 8.0%  | 1.93 | 1.09 – 3.53 | 0.028   |
| 55-59                          | 132  | 9.2%  | 22  | 9.8%  | 1.61 | 0.94 – 2.84 | 0.088   |
| 60-64                          | 133  | 9.3%  | 13  | 5.8%  | 2.75 | 1.47 – 5.46 | 0.002   |
| 65-69                          | 85   | 5.9%  | 17  | 7.6%  | 1.34 | 0.75 – 2.52 | 0.340   |
| 70 and older                   | 115  | 8.0%  | 5   | 2.2%  | 6.18 | 2.62 – 18.2 | < 0.001 |
| Gender                         |      |       |     |       |      |             |         |
| Male                           | 628  | 43.8% | 107 | 47.6% | 1.00 | -           | -       |
| Female                         | 805  | 56.2% | 118 | 52.4% | 1.16 | 0.88 – 1.54 | 0.295   |
| Ethnic Group                   |      |       |     |       |      |             |         |
| NZ European                    | 1228 | 85.7% | 138 | 61.3% | 1.00 | -           | -       |
| Maori                          | 29   | 2.0%  | 12  | 5.3%  | 0.27 | 0.14 – 0.56 | < 0.001 |
| Other                          | 176  | 12.3% | 75  | 33.3% | 0.27 | 0.19 – 0.37 | < 0.001 |
| Work Status                    |      |       |     |       |      |             |         |
| Full time                      | 702  | 49.0% | 118 | 52.4% | 1.00 | -           | -       |
| Part time                      | 372  | 26.0% | 48  | 21.3% | 1.30 | 0.92 – 1.88 | 0.148   |
| Not working                    | 359  | 25.1% | 59  | 26.2% | 1.02 | 0.73 – 1.44 | 0.896   |
| Highest Education              |      |       |     |       |      |             |         |
| Below Year 13                  | 242  | 16.9% | 54  | 24.0% | 1.00 | -           | -       |
| Completed Year 13              | 220  | 15.4% | 25  | 11.1% | 1.96 | 1.19 – 3.31 | 0.009   |
| Technical or Further Education | 420  | 29.3% | 51  | 22.7% | 1.84 | 1.21 – 2.78 | 0.004   |
| University                     | 494  | 34.5% | 83  | 36.9% | 1.33 | 0.91 – 1.93 | 0.139   |
| Prefer not to say              | 57   | 4.0%  | 12  | 5.3%  | 1.06 | 0.55 – 2.19 | 0.868   |
| Household Income               |      |       |     |       |      |             |         |
| Under \$40k                    | 289  | 20.2% | 45  | 20.0% | 1.00 | -           | -       |
| \$40k - \$70k                  | 333  | 23.2% | 57  | 25.3% | 0.91 | 0.59 – 1.38 | 0.660   |
| \$71k - \$90k                  | 186  | 13.0% | 32  | 14.2% | 0.92 | 0.56 – 1.49 | 0.689   |
| More than \$90k                | 413  | 28.8% | 69  | 30.7% | 0.93 | 0.62 – 1.39 | 0.733   |
| Prefer not to say              | 212  | 14.8% | 22  | 9.8%  | 1.50 | 0.88 – 2.62 | 0.141   |
| Marital Status                 |      |       |     |       |      |             |         |

# Supplementary Information

Gates et al.

New Zealand Veterinary Journal

S5

|                                |       |       |     |       |      |             |         |
|--------------------------------|-------|-------|-----|-------|------|-------------|---------|
| Single or Never Married        | 325   | 22.7% | 51  | 22.7% | 1.00 | -           | -       |
| Living Together                | 297   | 20.7% | 48  | 21.3% | 0.97 | 0.63 – 1.48 | 0.892   |
| Married                        | 628   | 43.8% | 97  | 43.1% | 1.01 | 0.70 – 1.46 | 0.932   |
| Divorced or Widowed            | 183   | 12.8% | 29  | 12.9% | 0.99 | 0.61 – 1.63 | 0.969   |
| Number of Adults               |       |       |     |       |      |             |         |
| 1                              | 222   | 15.5% | 28  | 12.4% | 1.00 | -           | -       |
| 2                              | 826   | 57.6% | 126 | 56.0% | 0.83 | 0.53 – 1.26 | 0.392   |
| 3                              | 248   | 17.3% | 31  | 13.8% | 1.01 | 0.58 – 1.74 | 0.974   |
| 4                              | 85    | 5.9%  | 13  | 5.8%  | 0.82 | 0.42 – 1.71 | 0.591   |
| 5                              | 29    | 2.0%  | 9   | 4.0%  | 0.41 | 0.17 – 0.99 | 0.037   |
| 6 or more                      | 23    | 1.6%  | 18  | 8.0%  | 0.16 | 0.16 – 0.34 | < 0.001 |
| Number of Children             |       |       |     |       |      |             |         |
| None                           | 876   | 61.1% | 124 | 55.1% | 1.00 | -           | -       |
| 1                              | 251   | 17.5% | 43  | 19.1% | 0.83 | 0.57 – 1.21 | 0.318   |
| 2                              | 202   | 14.1% | 38  | 16.9% | 0.75 | 0.51 – 1.13 | 0.157   |
| 3                              | 74    | 5.2%  | 6   | 2.7%  | 1.75 | 0.81 – 4.57 | 0.200   |
| 4                              | 24    | 1.7%  | 13  | 5.8%  | 0.26 | 0.13 – 0.54 | < 0.001 |
| 5 or more                      | 6     | 0.4%  | 1   | 0.4%  | 0.85 | 0.14 – 16.1 | 0.880   |
| Importance of desexing         |       |       |     |       |      |             |         |
| Not important                  | 19    | 1.3%  | 45  | 20.0% | 1.00 | -           | -       |
| Somewhat important             | 228   | 15.9% | 96  | 42.7% | 5.62 | 3.17 – 10.3 | < 0.001 |
| Very important                 | 1157  | 80.7% | 71  | 31.6% | 38.6 | 21.8 – 70.9 | < 0.001 |
| Don't know                     | 29    | 2.0%  | 13  | 5.8%  | 5.28 | 2.31 – 12.7 | < 0.001 |
| Importance of predation        |       |       |     |       |      |             |         |
| Not important                  | 39    | 2.7%  | 9   | 4.0%  | 1.00 | -           | -       |
| Somewhat important             | 449   | 31.3% | 65  | 28.9% | 1.59 | 0.70 – 3.31 | 0.235   |
| Very important                 | 772   | 53.9% | 112 | 49.8% | 1.59 | 0.71 – 3.23 | 0.226   |
| Don't know                     | 173   | 12.1% | 39  | 17.3% | 1.02 | 0.44 – 2.21 | 0.955   |
| Importance of routine vet care |       |       |     |       |      |             |         |
| Not important                  | 73    | 5.1%  | 18  | 8.0%  | 1.00 | -           | -       |
| Somewhat important             | 429   | 29.9% | 80  | 35.6% | 1.32 | 0.73 – 2.29 | 0.335   |
| Very important                 | 902   | 62.9% | 121 | 53.8% | 1.84 | 1.04 – 3.12 | 0.030   |
| Don't know                     | 29    | 2.0%  | 6   | 2.7%  | 1.19 | 0.45 – 3.56 | 0.736   |
| Total                          | 1,433 |       | 225 |       |      |             |         |

**SupplementaryTable 3. Opinions of 1,572 survey respondents towards free-roaming cat management strategies in New Zealand stratified by key owner demographic characteristics.**

| Variable <sup>a</sup>                  | Levels                                     | All Respondents<br>(n = 1,572) |       | Cat Owners<br>(n = 696) |       | Believes predation is a very important concern<br>(n = 905) |       | Cat owners that keep cats indoors only<br>(n = 60) |       | Does Not Own Any Pets<br>(n = 559) |       |
|----------------------------------------|--------------------------------------------|--------------------------------|-------|-------------------------|-------|-------------------------------------------------------------|-------|----------------------------------------------------|-------|------------------------------------|-------|
|                                        |                                            | N                              | %     | N                       | %     | N                                                           | %     | N                                                  | %     | N                                  | %     |
| Aware of strays in the local community | Yes                                        | 445                            | 28.3% | 212                     | 30.7% | 266                                                         | 29.4% | 20                                                 | 33.3% | 148                                | 26.5% |
|                                        | No                                         | 947                            | 60.2% | 414                     | 59.5% | 536                                                         | 59.2% | 34                                                 | 56.7% | 338                                | 60.4% |
|                                        | Don't know                                 | 180                            | 11.5% | 68                      | 9.8%  | 103                                                         | 11.4% | 6                                                  | 10.0% | 73                                 | 20.2% |
| Who should be responsible for strays?  | Strays are self-sufficient                 | 124                            | 7.9%  | 58                      | 8.3%  | 57                                                          | 6.3%  | 4                                                  | 6.7%  | 45                                 | 8.1%  |
|                                        | Everyone in the community                  | 166                            | 10.6% | 96                      | 13.8% | 89                                                          | 9.8%  | 10                                                 | 16.7% | 47                                 | 8.4%  |
|                                        | Local people                               | 144                            | 9.2%  | 76                      | 10.9% | 73                                                          | 8.1%  | 6                                                  | 10.0% | 40                                 | 7.2%  |
|                                        | Local council                              | 479                            | 30.5% | 178                     | 25.5% | 292                                                         | 32.3% | 17                                                 | 28.3% | 182                                | 32.6% |
|                                        | Animal welfare organization                | 546                            | 34.7% | 233                     | 33.4% | 333                                                         | 36.8% | 17                                                 | 28.3% | 216                                | 38.6% |
|                                        | None of the above                          | 113                            | 7.2%  | 55                      | 7.9%  | 61                                                          | 6.7%  | 6                                                  | 10.0% | 29                                 | 5.2%  |
| How should stray cats be handled?      | Left alone                                 | 152                            | 9.7%  | 78                      | 11.2% | 71                                                          | 7.8%  | 5                                                  | 8.3%  | 48                                 | 8.6%  |
|                                        | Assessed and re-homed                      | 331                            | 21.1% | 157                     | 22.6% | 201                                                         | 22.2% | 21                                                 | 35.0% | 110                                | 19.7% |
|                                        | Assessed and euthanized                    | 787                            | 50.1% | 316                     | 45.4% | 456                                                         | 50.4% | 19                                                 | 31.7% | 301                                | 53.8% |
|                                        | Some other way                             | 102                            | 6.5%  | 60                      | 8.6%  | 69                                                          | 7.6%  | 8                                                  | 13.3% | 25                                 | 4.5%  |
|                                        | Don't know                                 | 200                            | 12.8% | 85                      | 12.2% | 108                                                         | 11.9% | 7                                                  | 11.7% | 75                                 | 13.4% |
| Predation by cats                      | Significant issue                          | 393                            | 25.0% | 118                     | 17.0% | 280                                                         | 30.9% | 17                                                 | 28.3% | 161                                | 28.8% |
|                                        | Issue only in ecologically sensitive areas | 736                            | 46.8% | 354                     | 50.9% | 425                                                         | 47.0% | 23                                                 | 38.3% | 250                                | 44.7% |
|                                        | Not an issue                               | 289                            | 18.4% | 155                     | 22.7% | 131                                                         | 14.4% | 14                                                 | 23.3% | 94                                 | 16.8% |
|                                        | None of the above                          | 154                            | 9.8%  | 69                      | 19.0% | 69                                                          | 7.6%  | 6                                                  | 10.0% | 54                                 | 9.7%  |
| Opinions on confining cats             | Cats should be confined                    | 577                            | 36.7% | 147                     | 21.1% | 378                                                         | 41.8% | 26                                                 | 43.3% | 271                                | 48.4% |
|                                        | Cats should be allowed to roam             | 713                            | 45.4% | 417                     | 59.9% | 369                                                         | 40.8% | 24                                                 | 40.0% | 198                                | 35.4% |
|                                        | None of the above                          | 282                            | 17.9% | 132                     | 18.9% | 158                                                         | 17.5% | 10                                                 | 16.7% | 90                                 | 16.1% |

## Supplementary Information

*Gates et al.*

*New Zealand Veterinary Journal*

S7

|                                                  |                |     |       |     |       |     |       |    |       |     |       |
|--------------------------------------------------|----------------|-----|-------|-----|-------|-----|-------|----|-------|-----|-------|
| Keeping cats indoors at night should be enforced | No             | 777 | 49.4% | 440 | 63.2% | 391 | 43.2% | 20 | 33.3% | 230 | 41.1% |
|                                                  | Yes by owners  | 706 | 44.9% | 239 | 34.3% | 447 | 49.4% | 35 | 58.3% | 295 | 52.8% |
|                                                  | Yes by council | 85  | 5.4%  | 17  | 2.4%  | 65  | 7.2%  | 5  | 8.3%  | 34  | 6.1%  |
|                                                  | Yes by others  | 4   | 0.3%  | 0   | 0.0%  | 2   | 0.2%  | 0  | 0.0%  | 0   | 0.0%  |

<sup>a</sup> Questions were worded to allow respondents to select only one option from the given choices

**SupplementaryTable 4. Opinions of 1,572 survey respondents towards aggressive dog management strategies in New Zealand stratified by key owner demographic characteristics**

| Variable                                                              | Levels                                                               | All Respondents<br>(n = 1,572) |       | Dog Owners<br>(n = 443) |       | Respondent, Household Member or Pet Bitten in Last 12 months<br>(n = 126) |       | Has at Least One Child Under 18 Years Old<br>(n = 544) |       | Does Not Own Any Pets<br>(n = 559) |       |
|-----------------------------------------------------------------------|----------------------------------------------------------------------|--------------------------------|-------|-------------------------|-------|---------------------------------------------------------------------------|-------|--------------------------------------------------------|-------|------------------------------------|-------|
|                                                                       |                                                                      | N                              | %     | N                       | %     | N                                                                         | %     | N                                                      | %     | N                                  | %     |
| Strategies to support safety around dogs <sup>a</sup>                 | Education programmes for children                                    | 1,055                          | 67.1% | 323                     | 72.9% | 84                                                                        | 66.7% | 370                                                    | 68.0% | 352                                | 62.9% |
|                                                                       | Education programmes for teenagers and adults                        | 838                            | 53.3% | 251                     | 56.7% | 65                                                                        | 51.5% | 273                                                    | 50.1% | 287                                | 51.3% |
|                                                                       | Registration and education of dog owners                             | 980                            | 62.3% | 242                     | 54.7% | 66                                                                        | 52.4% | 317                                                    | 58.3% | 362                                | 64.7% |
|                                                                       | Additional enforcement power given to local councils                 | 820                            | 52.2% | 206                     | 46.5% | 68                                                                        | 53.9% | 294                                                    | 54.0% | 307                                | 54.9% |
|                                                                       | None of the above                                                    | 71                             | 4.5%  | 28                      | 6.3%  | 4                                                                         | 3.2%  | 32                                                     | 5.9%  | 22                                 | 3.9%  |
| Course of action for dogs that have bitten people <sup>b</sup>        | Dog should be destroyed                                              | 248                            | 15.8% | 47                      | 10.6% | 19                                                                        | 15.1% | 88                                                     | 16.2% | 98                                 | 17.5% |
|                                                                       | Dog should be assessed by an expert who will determine action        | 849                            | 54.0% | 240                     | 54.2% | 69                                                                        | 54.8% | 300                                                    | 55.1% | 290                                | 51.8% |
|                                                                       | Dog should be given three-strikes before being assessed by an expert | 155                            | 9.9%  | 50                      | 11.2% | 12                                                                        | 9.5%  | 55                                                     | 10.1% | 54                                 | 9.7%  |
|                                                                       | Dog should remain on the owner's property at all times               | 72                             | 4.6%  | 25                      | 5.6%  | 12                                                                        | 9.5%  | 27                                                     | 5.0%  | 25                                 | 4.5%  |
|                                                                       | Dog should always be muzzled in public                               | 124                            | 7.9%  | 35                      | 7.9%  | 6                                                                         | 4.8%  | 31                                                     | 5.7%  | 48                                 | 8.6%  |
|                                                                       | Something else                                                       | 62                             | 3.9%  | 22                      | 5.0%  | 4                                                                         | 3.2%  | 16                                                     | 2.9%  | 18                                 | 3.2%  |
|                                                                       | Don't know                                                           | 62                             | 3.9%  | 24                      | 5.4%  | 4                                                                         | 3.2%  | 27                                                     | 5.0%  | 26                                 | 4.7%  |
| Course of action for dogs that have bitten other animals <sup>b</sup> | Dog should be destroyed                                              | 134                            | 8.5%  | 21                      | 4.7%  | 13                                                                        | 10.3% | 48                                                     | 8.8%  | 49                                 | 8.8%  |
|                                                                       | Dog should be assessed by an expert who will                         | 820                            | 52.2% | 233                     | 52.5% | 62                                                                        | 49.2% | 287                                                    | 52.8% | 289                                | 51.7% |



|                                                                                 |                                                                      |       |       |     |       |    |       |     |       |     |       |
|---------------------------------------------------------------------------------|----------------------------------------------------------------------|-------|-------|-----|-------|----|-------|-----|-------|-----|-------|
|                                                                                 | determine action                                                     |       |       |     |       |    |       |     |       |     |       |
|                                                                                 | Dog should be given three-strikes before being assessed by an expert | 211   | 13.4% | 61  | 13.7% | 15 | 11.9% | 82  | 15.1% | 77  | 13.8% |
|                                                                                 | Dog should remain on the owner's property at all times               | 81    | 5.2%  | 25  | 5.6%  | 12 | 9.5%  | 30  | 5.5%  | 25  | 4.5%  |
|                                                                                 | Dog should always be muzzled in public                               | 203   | 12.9% | 64  | 14.4% | 14 | 11.1% | 57  | 10.4% | 75  | 13.4% |
|                                                                                 | Something else                                                       | 34    | 2.2%  | 13  | 2.9%  | 2  | 1.6%  | 7   | 1.3%  | 7   | 1.3%  |
|                                                                                 | Don't know                                                           | 89    | 5.7%  | 26  | 5.9%  | 8  | 6.3%  | 33  | 6.1%  | 37  | 6.6%  |
| Course of action for owners of dogs that have bitten people <sup>a</sup>        | Owner should be fined                                                | 751   | 47.8% | 178 | 40.2% | 55 | 43.7% | 267 | 49.1% | 294 | 52.6% |
|                                                                                 | Owner should attend mandatory education programme                    | 1,022 | 65.0% | 289 | 65.2% | 70 | 55.6% | 352 | 64.7% | 360 | 64.4% |
|                                                                                 | If dog was destroyed, owner should be banned from keeping other dogs | 696   | 44.3% | 161 | 36.3% | 49 | 38.9% | 232 | 42.6% | 277 | 49.6% |
|                                                                                 | None of the above                                                    | 115   | 7.3%  | 55  | 12.4% | 17 | 13.5% | 37  | 6.8%  | 26  | 4.7%  |
| Course of action for owners of dogs that have bitten other animals <sup>a</sup> | Owner should be fined                                                | 674   | 42.8% | 173 | 39.1% | 46 | 36.5% | 247 | 45.4% | 253 | 45.3% |
|                                                                                 | Owner should attend mandatory education programme                    | 1,024 | 65.1% | 280 | 63.2% | 78 | 61.9% | 339 | 62.3% | 377 | 67.4% |
|                                                                                 | If dog was destroyed, owner should be banned from keeping other dogs | 592   | 37.7% | 141 | 31.8% | 44 | 34.9% | 202 | 37.1% | 221 | 39.5% |
|                                                                                 | None of the above                                                    | 128   | 8.1%  | 52  | 11.7% | 14 | 11.1% | 37  | 6.8%  | 39  | 7.0%  |

<sup>a</sup> Question was worded to allow respondents to select all options that apply from the given choices

<sup>b</sup> Question was worded to allow respondents to select only one option from the given choices
